# Supplementary material for: Self-assembled 1D/3D heterojunction enables all-inorganic perovskite 4-terminal tandem solar cells with 21.54% certified efficiency
Source: Research Square preprint supplement (doi:10.21203/rs.3.rs-8150990/v1), 2025-11-25
Supplement: Supplementary file 1 [file 85014d8117d7f0570ee4ad12.docx]

Supplementary Information

**Self-assembled 1D/3D heterojunction enables all-inorganic perovskite** **4-terminal tandem solar cells with 21.54% certified efficiency**

Hao Zhang1,2, Mingyu Hu1,3*, Qingqing Zhang4, Yen-Hung Lin4*, Qiang Lou2, Maojun Sun2, Yueyu Xu1, Yi He1, Kai Zhang1, Shanshan Yu1,5, Haifeng Wu6, Haibiao Chen7, Linling Li7, Liting Zeng7, Xinxin Xu2, Jiazheng Wang2, Jingyi Xu2, Dezhen Kong1, Jin Shang1, Yuqing Su1, Xiangyu Li1, Hang Zhou2*, Shihe Yang1,5*

1Guangdong Provincial Key Lab of Nano-Micro Materials Research, School of Advanced Materials, Shenzhen Graduate School, Peking University, Shenzhen, 518055, China

2Guangdong Provincial Key Laboratory of In-Memory Computing Chips, School of Electronic and Computer Engineering, Peking University, Shenzhen 518055, China

3School of Physics and Photoelectronic Engineering, Ludong University, Yantai, Shandong, 264025 China

4Department of Electronic and Computer Engineering, The Hong Kong University of Science and Technology, Kowloon, Hong Kong, 999077 China

State Key Laboratory of Displays and Opto-Electronics, The Hong Kong University of Science and Technology, Kowloon, Hong Kong, 999077 China

5Institute of Biomedical Engineering, Shenzhen Bay Laboratory, Shenzhen, Guangdong 518107, China

6Quantum Sensing and Precision Instruments Division, CIQTEK Co., Ltd., Hefei 230088, Anhui, China

7Institute of Critical Materials for Integrated Circuits, Shenzhen Polytechnic University, Shenzhen, Guangdong 518055, China

*Correspondence e-mail: mingyu_hu@ldu.edu.cn; yh.lin@ust.hk; zhouh81@pkusz.edu.cn; chsyang@pku.edu.cn

**Supplementary Fig. 1 | Structural and strain characterization. a** Comparison of XRD peak intensities and FWHM values for (110) planes. **b** Williamson-Hall analysis of residual tensile strain in perovskite films.

**Supplementary Fig. 2 | GIWAXS spectra.** GIWAXS pattern of control film and TTFS/TCBH/TPNP-treated film.

**Supplementary Fig. 3 | Anion-dependent assembly orientations.** **a** Vertical assembly of TBA+/ CF3SO3- driven by unilateral charge concentration. **b** Horizontal assembly of TBA+/ p-NO2-PhO- driven by bilateral charge distribution. **c** Dual-orientation assembly of TBA+/ BH3CN- driven by charge delocalization

**Supplementary Fig. 4 | Structural-induced variation in electron transport.** Electron density difference schematic diagram (electron density isosurface value is 0.0001)

**Supplementary Fig. 5 | Molecular distribution depth profiling.** TOF-SIMS depth profile of TBA⁺ cation and CF₃SO₃⁻ anion distribution.

**Supplementary Fig. 6 | Thermal annealing control experiments.** XRD patterns of control films after 5 min annealing at 70°C.

**Supplementary Fig. 7 | In situ strain evolution. a** Comparison of XRD peak intensities and FWHM values for (110) planes during annealing. **b** Comparison of XRD peak intensities for 1D, δ and PbI2 phase during annealing. **c** Williamson-Hall analysis of residual strain during progressive annealing stages (0s, 30s, 5min).

**Supplementary Fig. 8 | Spatial distribution of functional groups.** Stereogram of micro-region FTIR spectra.

**Supplementary Fig. 9 | Surface potential modification.** Contact potential difference (CPD) mappings images of control and TTFS-treated surfaces.

**Supplementary Fig. 10 | Comprehensive XPS analysis.** XPS data of the CsPbI3-xBrx perovskite films with and without TTFS treatment: **a** Cs 3d, **b** I 3d, **c** Br 3d, **d** S 2p, **e** O1s, **f** F 1s and **g** N 1s.

**Supplementary Fig. 11 | Ultraviolet photoelectron spectroscopy.** UPS spectra (secondary electron cutoff region and Fermi edge region) for work function calculation of (**a)** control and (**b)** TTFS-treated films.

**Supplementary Fig. 12 | Device performance validation.** Photovoltaic parameters of devices fabricated from perovskite films at four distinct processing stages.

**Supplementary Fig. 13 | Non-radiative recombination analysis.** Open-circuit voltage dependence on light intensity.

**Supplementary Fig. 14 | Mott-Schottky characterization.** Capacitance-voltage measurements for built-in potential extraction.

**Supplementary Fig. 15 | Dark current transport properties.** Dark J-V curves of treated and untreated devices.

**Supplementary Fig. 16 | Transient photovoltage dynamics.** Normalized TPV decay curves with biexponential fitting parameters.

**Supplementary Fig. 17 | Optical transmission performance.** Transmittance spectra of ITO/Ag electrode stacks versus wavelength (300-1000 nm).

**Supplementary Fig. 18 | Certified efficiency validation.** Certified J-V curve for 4-T tandem device.

**Supplementary Fig. 19 | Spectral response analysis.** EQE spectra of individual wide/narrow-bandgap subcells.

**Supplementary Table 1 | The J–V parameters of the champion devices with and without TTFS/TCBH/TPNP treatment.**

| Sample | VOC (V) | JSC (mA/cm2) | FF (%) | PCE (%) |
| --- | --- | --- | --- | --- |
| W/O | 1.063 | 20.36 | 81.01 | 17.53 |
| With TTFS | 1.179 | 20.75 | 83.85 | 20.51 |
| With TCBH | 1.115 | 20.63 | 84.15 | 19.36 |
| With TPNP | 1.107 | 20.66 | 81.82 | 18.71 |

**Supplementary Table 2 | Hysteresis behavior of PSCs with and without TTFS treatment.**

| Sample | VOC  (V) | | JSC (mA/cm2) | FF (%) | PCE  (%) | H factor  (%) |
| --- | --- | --- | --- | --- | --- | --- |
| W/O TTFS-reverse | 1.120 | 20.17 | | 76.76 | 17.34 | 12.34 |
| W/O TTFS-forward | 1.057 | 20.17 | | 71.29 | 15.20 |
| With TTFS-reverse | 1.179 | 20.75 | | 83.85 | 20.51 | 3.51 |
| With TTFS-forward | 1.172 | 20.74 | | 81.41 | 19.79 |
